# Supplementary material for: Retrospective Optimization of the Hawkeye Orbital Fracture Prioritization and Evaluation Algorithms for Triaging Ophthalmic Care
Source: PubMed Central journal article supplement — Ophthalmol Sci. 2023 Dec 10;4(3):100447. doi: 10.1016/j.xops.2023.100447 (PMC10810741; doi:10.1016/j.xops.2023.100447), 2023-12-10
Supplement: mmc1.pdf [file mmc1.pdf]

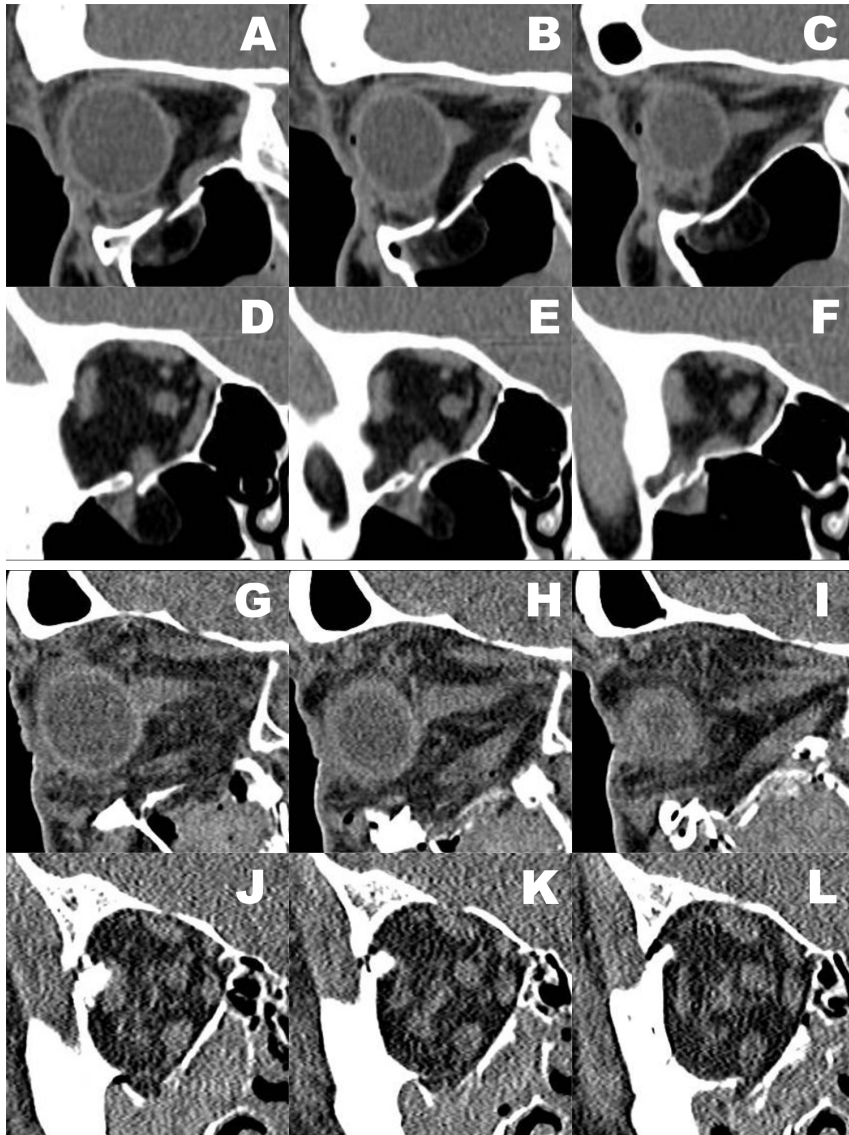

**Supplemental Figure 2.** Sagittal and coronal computerized tomography (CT) slices of two patients with right inferior orbital wall fractures. Sagittal (A-C) and coronal (D-F) CT images of a patient with clinically confirmed entrapment where ophthalmology and radiology both interpreted concern for inferior rectus muscle entrapment. Sagittal (G-I) and coronal (J-K) CT images of another patient where ophthalmology interpreted the scan as not concerning for extraocular muscle entrapment, while radiology mentioned concern for inferior rectus entrapment, and the patient did not have clinical evidence of entrapment.
